# When does gene flow facilitate evolutionary rescue?

Matteo Tomasini<sup>1, 2, 3, 4, \*</sup> and Stephan Peischl<sup>1, 3, †</sup>

<sup>1</sup>Interfaculty Bioinformatics Unit, University of Bern, 3012 Bern, Switzerland

<sup>2</sup>Computational and Molecular Population Genetics Laboratory, Institute of Ecology and Evolution, University of Bern, 3012 Bern, Switzerland

<sup>3</sup>Swiss Institute for Bioinformatics, 1015 Lausanne, Switzerland

<sup>4</sup>Department of Integrative Biology, Michigan State University, East Lansing, MI 48824, USA

\*Current affiliation: Michigan State University

†Corresponding author: [stephan.peischl@bioinformatics.unibe.ch](mailto:stephan.peischl@bioinformatics.unibe.ch)

April 9, 2020

## Abstract

Experimental and theoretical studies have highlighted the impact of gene flow on the probability of evolutionary rescue in structured habitats. Mathematical modelling and simulations of evolutionary rescue in spatially or otherwise structured populations showed that intermediate migration rates can often maximize the probability of rescue in gradually or abruptly deteriorating habitats. These theoretical results corroborate the positive effect of gene flow on evolutionary rescue that has been identified in experimental yeast populations. The observations that gene flow can facilitate adaptation are in seeming conflict with traditional population genetics results that show that gene flow usually hampers (local) adaptation. Identifying conditions for when gene flow facilitates survival chances of populations rather than reducing them remains a key unresolved theoretical question. We here present a simple analytically tractable model for evolutionary rescue in a two-deme model with gene flow. Our main result is a simple condition for when migration facilitates evolutionary rescue, as opposed as no migration. We further investigate the roles of asymmetries in gene flow and / or carrying capacities, and the effects of density regulation and local growth rates on evolutionary rescue.

## Introduction

Evolutionary rescue refers to the process of rapid adaptation to prevent extinction in the face of severe environmental change [Gomulkiewicz and Holt, 1995]. It is of particular interest in light of recent environmental and climatic change, with the potential to lead to new conservation strategies [Ashley et al., 2003]. Evolutionary rescue also plays a major role in other fields of public

32 importance, such as the evolution of antibiotic or other treatment resistance (e.g. [Normark and](#)  
33 [Normark \[2002\]](#)), or resistance to pesticides (e.g. [Chevillon et al. \[1999\]](#)). Better understanding  
34 of evolutionary rescue is therefore critical in the context of global climatic change as well as in  
35 the field of evolutionary medicine. Experimental evolution studies of evolutionary rescue and an-  
36 tibiotic resistance are burgeoning (reviewed in [Bell \[2017\]](#)), empirical evidence for rescue under  
37 anthropogenic stress is now abundant [[Hughes and Andersson, 2017](#), [Bell, 2017](#)], whereas evidence  
38 for rescue under natural conditions is difficult to obtain and more scarce (but see [Vander Wal et al.](#)  
39 [\[2013\]](#)).

40 The theoretical foundations for evolutionary rescue in single panmictic populations are laid out  
41 [[Orr and Unckless, 2014](#)] and several demographic genetic and extrinsic features that affect the  
42 chance for rescue have been identified (see table 1 in [Carlson et al. \[2014\]](#) for an overview), in-  
43 cluding the effects of recombination [[Uecker and Hermisson, 2016](#)], mating system [[Uecker, 2017](#)],  
44 intra-specific competition [[Osmond and de Mazancourt, 2013](#), [Bono et al., 2015](#)], inter-specific  
45 competition [[De Mazancourt et al., 2008](#)], and phenotypic plasticity [[Chevin et al., 2013](#), [Carja](#)  
46 [and Plotkin, 2019](#)]. A major goal of evolutionary rescue theory is to predict a population's chance  
47 of survival in the face of severe stress. Key theoretical predictions of evolutionary rescue have  
48 been strikingly confirmed in laboratory conditions [[Carlson et al., 2014](#)], for instance using yeast  
49 populations exposed to high salt concentrations [[Bell, 2013](#)]. In particular, it was found that only  
50 sufficiently large populations could be expected to persist through adaptation [[Lynch, 1993](#), [Bell](#)  
51 [and Gonzalez, 2009](#), [Samani and Bell, 2010](#), [Bell and Gonzalez, 2011](#), [Ramsayer et al., 2013](#), [Bell,](#)  
52 [2013](#)]). A second feature that has been shown to facilitate the chance for evolutionary rescue theo-  
53 retically as well as experimentally is standing genetic variation [[Barrett and Schluter, 2008](#), [Agashe](#)  
54 [et al., 2011](#), [Lachapelle and Bell, 2012](#), [Vander Wal et al., 2013](#), [Ramsayer et al., 2013](#)]. Despite  
55 these advances, however, predicting evolutionary outcomes outside of the lab remains extremely  
56 difficult [[Gomulkiewicz and Shaw, 2013](#)].

57 Evolutionary dynamics in spatially (or otherwise) structured populations can differ dramatically  
58 from those in well-mixed populations [[Lion et al., 2011](#)] and unexpected rescue mechanisms may  
59 arise in such settings [[Peischl and Gilbert, 2018](#)]. Empirical and experimental results have high-  
60 lighted the importance of dispersal for evolutionary rescue in metapopulations subject to gradual  
61 environmental change. Using an experimental metapopulation of yeast exposed to gradually in-  
62 creasing environmental stress, [Bell and Gonzalez \[2011\]](#) showed that gene flow between different  
63 habitats can have positive effects on survival in changing environments, depending on dispersal  
64 distances and the speed of the environmental change. A detailed theoretical study of evolution-  
65 ary rescue in structured populations using mathematical analysis and simulations confirmed that  
66 intermediate gene flow between populations can maximize the chance of rescue as compared to a  
67 population without gene flow [[Uecker et al., 2014](#)] in some cases. [Uecker et al. \[2014\]](#) identified  
68 two direct consequences of dispersal: (i) the unperturbed environment acts as a source for wild-  
69 type individuals that might mutate, thus increasing the chances of rescue, and (ii) dispersal moves  
70 mutant individuals to regions of the environment where the presence of the mutation is costly,

71 leading to a net reduction of the mutant growth rate, and consequent lower rates of survival. The  
72 interplay between these two effects can often lead to situations in which the probability of rescue  
73 is maximized for an intermediate migration rate [Uecker et al., 2014]. In a continuous space model  
74 where the environment changes gradually across space and/or time, increased dispersal generally  
75 decreases the probability of establishment of rescue mutations, but it increases the effective popu-  
76 lation size of individuals that can contribute to evolutionary rescue [Kirkpatrick and Peischl, 2013].  
77 Individual based simulations of gradually changing conditions and divergent selection between two  
78 habitats identified interactions of evolutionary rescue and local adaptation in a two-deme model  
79 [Bourne et al., 2014]. These results suggest that gene flow is beneficial for population survival only  
80 when divergent selection is relatively weak. These results were largely confirmed in a simulation  
81 study of a 2D metapopulation [Schiffers et al., 2013].

82 Although both theoretical and experimental studies have identified potentially positive effects of  
83 gene flow on survival in metapopulation models of evolutionary rescue, the exact conditions when  
84 gene flow is detrimental to survival and when not remain unclear. For instance, the observation  
85 that gene flow can facilitate rescue in a changing environment is in seeming conflict with more tradi-  
86 tional results that show that dispersal does generally not have a positive effect on (local) adaptation  
87 [Bulmer, 1972, Holt and Gomulkiewicz, 1997, Lenormand, 2002]). High migration rates can lead  
88 to gene swamping in models with divergent selection pressures between different regions [Bulmer,  
89 1972, Lenormand, 2002], thus reducing chances of survival during environmental change. Ident-  
90 ifying conditions under which dispersal facilitates evolutionary rescue in spatially or otherwise  
91 structured populations remains a key unresolved question, both theoretically and empirically.

92 In this article, we present an analytically tractable model with two demes that exchange migrants,  
93 and with temporal change in environmental conditions. We focus on the case where the two demes  
94 deteriorate at different points in time, such that gene flow between the populations influences  
95 both the demographic as well as the evolutionary dynamics of evolutionary rescue. In the new  
96 environmental conditions, growth rates are negative and the population faces eventual extinction.  
97 We consider rescue mutations at a single locus and assume that they are counter-selected in the  
98 original environmental conditions. We derive conditions for when gene flow facilitates evolutionary  
99 rescue as compared to two populations without gene flow. We study the role of asymmetric migra-  
100 tion rates or asymmetric carrying capacities (both cases can lead to source-sink dynamics, see Holt  
101 [1985], Pulliam [1988]), study the contributions of de novo mutations vs. standing genetic varia-  
102 tion, and investigate the role of local growth rates and density regulation within demes. Our aim  
103 is to understand when gene flow facilitates evolutionary rescue, and to disentangle the interactions  
104 between the strength of selection for rescue mutations, the speed and severity of environmental  
105 change, and the amount and mode of dispersal.

## 106 Model

107 We consider a haploid population with discrete non-overlapping generations, subdivided into two  
 108 demes, labeled 1 and 2, with gene flow between them. Individuals migrate from deme  $i$  to deme  $j$   
 109 with probability  $m_{ij}$  ( $i, j \in \{1, 2\}$ ). Fitness is determined by a single locus with two alleles: a wild-  
 110 type allele and a mutant allele. We distinguish two possible environmental states. At the beginning  
 111 both demes are in what we call the non-deteriorated state (or “old” state) and are at demographic  
 112 equilibrium, filled with  $\kappa_i$  individuals. The total population size is therefore  $K_{\text{tot}} = \kappa_1 + \kappa_2$ . At time  
 113  $t = 0$  deme 1 deteriorates (that is, it is now in the “new” state). In the deteriorated environment,  
 114 wild-type individuals have absolute fitness  $w_{\text{w}}^{(\text{n})} = 1 - r < 1$ , such that the population size in deme  
 115 1 declines at rate  $r$ . After  $\theta$  generations, deme 2 deteriorates too and local population size starts  
 116 to decline at the same rate as in deme 1. In the absence of adaptation to the novel environmental  
 117 conditions both demes will eventually go extinct. We assume that rescue mutations that restore  
 118 positive growth rates in the new environment occur at rate  $u$  per individual and generation, and  
 119 we ignore back mutations. The absolute fitness of a mutant individual is  $w_{\text{m}}^{(\text{n})} = 1 + z$  in the new  
 120 habitat ( $z > 0$ ). We assume that the mutation is detrimental in the old environment and denote its  
 121 carriers fitness by  $w_{\text{m}}^{(\text{o})} = 1 - s$  ( $0 < s \leq 1$ ). We call  $r$  the environmental stress due to deterioration,  
 122 and  $s$  and  $z$  are the selection coefficients of the mutant allele in the old and new state, respectively.  
 123 We will call “phase 1” the phase in which the two demes have different environments ( $0 < t < \theta$ )  
 124 and “phase 2” the phase in which both demes are deteriorated. See table 1 for a description of all  
 the parameters of the model.

Table 1: **List and description of all parameters**

| Parameter                             | Description                                                    |
|---------------------------------------|----------------------------------------------------------------|
| $N_i(t)$                              | Number of wild-type individuals in deme $i$                    |
| $K_{\text{tot}}$                      | Total carrying capacity of the habitat                         |
| $\kappa_i$                            | Carrying capacity of deme $i$                                  |
| $u = 1/K_{\text{tot}}$                | mutation rate                                                  |
| $m_{ij}$ , ( $0 \leq m_{ij} \leq 1$ ) | Rate of migration per population from deme $i$ to deme $j$     |
| $s$ , ( $0 < s \leq 1$ )              | Disadvantage against a mutant copy in the old environment      |
| $z$ , ( $0 < z \ll 1$ )               | Advantage of a mutant copy in the new environment              |
| $r$ , ( $0 < r < 1$ )                 | Stress against the wild-type population in the new environment |
| $w_{\text{wt}}^{(\text{o})} = 1$      | Fitness of a wild-type individual in the old environment       |
| $w_{\text{wt}}^{(\text{n})} = 1 - r$  | Fitness of a wild-type individual in the new environment       |
| $w_{\text{m}}^{(\text{o})} = 1 - s$   | Fitness of a mutant individual in the old environment          |
| $w_{\text{m}}^{(\text{n})} = 1 + z$   | Fitness of a mutant individual in the new environment          |
| $\theta$                              | Time between deterioration events                              |
| $f_0$                                 | Frequency of rescue mutations at time $t = 0$                  |

125

## 126 Probability of rescue

127 Let  $P_{\text{rescue}}$  denote the probability that a rescue mutation occurs and escapes genetic drift, such  
 128 that it will increase in frequency and eventually restore a positive growth rate and rescue the

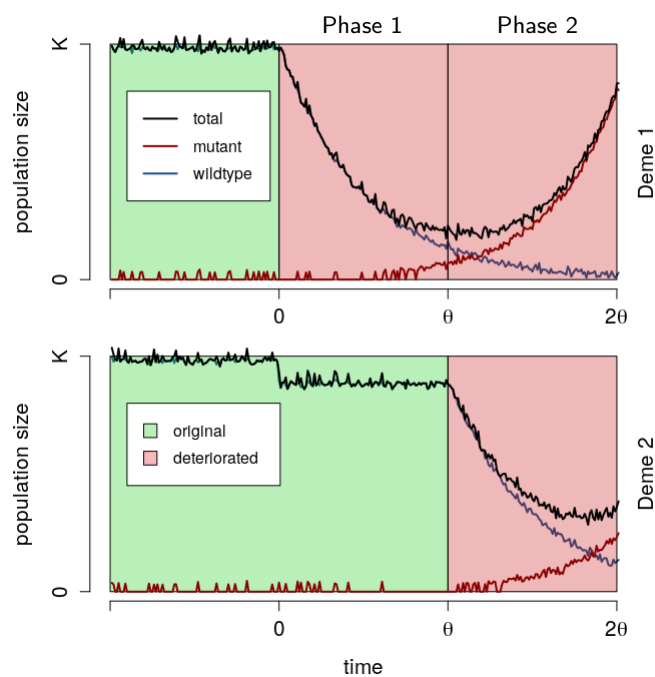

Figure 1: Schematic representation of evolutionary rescue in our model. On the upper panel, we show the population density in deme 1, in the lower panel the population density in deme 2. Deme 1 deteriorates at time  $t = 0$ , and deme 2 deteriorates at  $t = \theta$ . The total count of individuals in deme 1 exhibits the typical “U-shape” associated with evolutionary rescue [Gomulkiewicz and Holt, 1995] (the same would be true in deme 2 if we extended the  $x$ -axis). In deme 2, in phase 1 we depict the number of individuals present just before density regulation. The drop in population observed during this phase depends on the migration rate.

129 population from extinction. To calculate the probability of rescue, one needs to take into account  
130 two ingredients: (i) the number of mutations entering the population in each generation and (ii) the  
131 probability of establishment of each single mutant copy in the population. In a single population,  
132 one can write the probability of rescue as

$$P_{\text{rescue}} = 1 - \prod_{t=-\infty}^{\infty} (1 - uN(t)p(t)) , \quad (1)$$

133 where  $uN(t)$  is the expected number of mutations entering the population in each generation, and  
134  $p(t)$  is the probability that the mutation establishes and rescues the population [e.g., [Gomulkiewicz](#)  
135 [and Holt, 1995](#)]. We consider times from  $-\infty$  to  $+\infty$  here for mathematical convenience. Rescue  
136 mutations have a negligible probability of permanent establishment if they occur too early (at  
137 negative times  $t \ll 0$ ), as they are deleterious everywhere before phase 1. Similarly, for large times  
138 ( $t \gg 0$ ), the population will be extinct if no rescue mutation was successful before that.  
139 Evolutionary rescue can stem from standing genetic variation, with probability  $P_{\text{sgv}}$ , or from *de*  
140 *novo* mutations, with probability  $P_{\text{dn}}$ . We define *de novo* mutations as mutations that arose after  
141 the first deterioration event occurred (that is, after time  $t = 0$ ). We can thus write:

$$P_{\text{rescue}} = 1 - \prod_{t=-\infty}^0 (1 - uN(t)p(t)) \prod_{t=0}^{\infty} (1 - uN(t)p(t)) = 1 - (1 - P_{\text{sgv}})(1 - P_{\text{dn}}) . \quad (2)$$

142 Mutations that occur before phase 2 (that is, that occur before all demes are deteriorated) have  
143 different probabilities of establishment  $p^{(1)}(t)$  and  $p^{(2)}(t)$  depending on the deme in which they  
144 occur and the time at which they occur. However, currently no analytic solution is known for the  
145 establishment probabilities in this case. To proceed further we ignore the temporal heterogeneity  
146 in fitness values and use the current environmental conditions to calculate establishment probabili-  
147 ties using the results from [Tomasini and Peischl \[2018\]](#) for a time-homogeneous two-deme model  
148 (assuming a large population size and small selection coefficient, i.e.,  $1/N < z \ll 1$ ). This should  
149 be a good approximation if  $\theta \gg 0$ , since the fate of mutations in temporally changing environ-  
150 nments is determined in the first few generations after they occur [[Peischl and Kirkpatrick, 2012](#)]  
151 and the contribution of mutations occurring just before environments change will be negligible.  
152 In contrast, if  $\theta \approx 0$ , the change in environmental conditions is almost instantaneous across all  
153 demes, such that population structure and migration would have virtually no effect on evolutionary  
154 rescue [[Uecker et al., 2014](#)]. During phase 2, when the two demes are in the same environmental  
155 state, the probability of establishment is simply  $2z$  [[Haldane, 1927](#)]. [Tomasini and Peischl \[2018\]](#)  
156 use branching processes to obtain the probability of establishment of mutations under divergent  
157 selection, as is the case during phase 1. The expression is shown here for a case with symmetric  
158 migration ( $m_{12} = m_{21} = m/2$ ) [[Tomasini and Peischl, 2018](#)]. In the symmetric case, we define  
159 the rate of migration from one deme to the other as  $m/2$  for consistency with the island model  
160 with  $D$  demes [[Uecker et al., 2014](#)], where  $m_{ij} = m/D$ , for  $i, j \in \{1, \dots, D\}$ . The probabilities of

161 establishment for the two-deme model with symmetric migration are:

$$p^{(1)}(t) \approx \begin{cases} \max\left[z\left(1 + \frac{z+s}{\sqrt{m^2+(z+s)^2}}\right) - s\frac{m}{\sqrt{m^2+(z+s)^2}}, 0\right] & \text{if } t \in [0, \theta[, \\ 2z & \text{if } t \in [\theta, \infty[. \end{cases} \quad (3)$$

$$p^{(2)}(t) \approx \begin{cases} \max\left[z\frac{m}{\sqrt{m^2+(z+s)^2}} - s\left(1 - \frac{z+s}{\sqrt{m^2+(z+s)^2}}\right), 0\right] & \text{if } t \in [0, \theta[, \\ 2z & \text{if } t \in [\theta, \infty[. \end{cases} \quad (4)$$

163 Because mutations have a negligible probability to establish at  $t \ll 0$  (see discussion before equation  
164 (2)), the probability of rescue due to standing genetic variation,  $P_{\text{sgv}}$ , can be calculated as the  
165 probability of establishment of the mutations present in the population at time  $t = 0$  due to  
166 mutation-selection balance. We can then write

$$P_{\text{sgv}} \approx f_0 N_1(0) p^{(1)}(0) + f_0 N_2(0) p^{(2)}(0), \quad (5)$$

167 where  $f_0$  is the frequency of rescue mutations in each of the demes at time  $t = 0$ . Similarly, the  
168 total probability due to *de novo* mutations is given by

$$P_{\text{dn}} = 1 - \prod_{t=0}^{\infty} (1 - \pi_{\text{dn}}(t)). \quad (6)$$

169 where we approximate the joint probability that a copy of the rescue mutation will occur in  
170 generation  $t$  and then establish permanently by

$$\pi_{\text{dn}}(t) \approx \begin{cases} u(N_1(t)p^{(1)} + N_2(t)p^{(2)}) & \text{if } t \in [0, \theta[, \\ 2zu(N_1(t) + N_2(t)) & \text{if } t \in [\theta, \infty[. \end{cases} \quad (7)$$

171 To simplify calculations, we use that  $\prod_{t=0}^{\infty} (1 - \pi_{\text{dn}}(t)) \approx \exp[-\sum_{t=0}^{\infty} \pi_{\text{dn}}(t)]$  if  $\pi_{\text{dn}}$  is small, and  
172 for further simplicity, we do the calculation in continuous time, so that we can switch the sum for  
173 an integral. The probability of rescue from *de novo* mutations is then

$$P_{\text{dn}} \approx 1 - \exp\left[-\int_0^{\infty} \pi_{\text{dn}}(t) dt\right]. \quad (8)$$

## 174 Population dynamics

175 In order to calculate (6) and (7), we need to explicitly calculate the wild-type population sizes  
176  $N_1(t)$  and  $N_2(t)$  for  $t \geq 0$ . We assume that mutants are rare and hence we do not explicitly model  
177 their influence on demography. The only case where the number of mutants is large enough to  
178 effectively play a role is when a mutation is already on its way to establishment. We model the  
179 population dynamics as continuous in time, as we did in (8), and further assume that the mutation  
180 rate is low and neglect the number of wild-type individuals lost due to mutation. We assume that  
181 population growth and density regulation keep population density in deme 2 at carrying capacity,

182 that is  $N_2(t) = \kappa_2$ , during phase 1. Population size in deme 1 then follows the differential equation

$$\frac{dN_1(t)}{dt} = N_1(t) \left( -r - m_{12} \right) + m_{21} \kappa_2, \quad (9)$$

183 with initial condition  $N_1(0) = \kappa_1$ . During phase 2 ( $t \geq \theta$ ), when both demes are deteriorated,  
184  $N_1(t)$  and  $N_2(t)$  follow

$$\frac{dN_i(t)}{dt} = N_i(t) \left( -r - m_{ij} \right) + m_{ji} N_j(t), \quad (10)$$

185 where  $i, j \in \{1, 2\}$  and  $i \neq j$ . Solutions can be obtained straightforwardly – more details are given  
186 in the supplemental material (Appendix A, *e.g.* equation (S4) shows the solution for  $i = 1$ ). Figure  
187 1 shows the typical population dynamic trajectories during an evolutionary rescue event. In the  
188 absence of evolutionary rescue, population density would continue decaying until it reaches  $N = 0$ .

## 189 Simulation model

190 We performed stochastic simulations replicating biological processes to validate and extend our  
191 analytical findings. We filled a habitat with 20,000 individuals divided into two demes, labelled  
192  $i = 1, 2$ , with carrying capacities  $\kappa_i$ . We fixed the mutation rate at  $u = 1/K_{\text{tot}} = 5 \times 10^{-5}$ ,  
193 so that in a non-deteriorated habitat at carrying capacity on average one new mutant enters the  
194 population per generation. Increasing (decreasing)  $K_{\text{tot}}u$  will mainly lead to an increase (decrease)  
195 of the total rescue probability, and we hence keep  $K_{\text{tot}}u$  fixed throughout the paper. The initial  
196 mutant frequency  $f_0$  was assumed at mutation-selection equilibrium,  $f_0 = u/s$  [Gillespie, 2004].  
197 At  $t = 0$ , deme 1 deteriorated, and at  $t = \theta$  deme 2 deteriorated. Individuals in each deme  
198 reproduced, mutated and migrated, followed by density regulation. Generations are discrete and  
199 non-overlapping such that every generation the parental generation is replaced by its offspring.  
200 Each individual had Poisson distributed number of offspring with its mean proportional to the  
201 individuals fitness  $w$  (see table 1 for the definitions of fitnesses  $w$ ). Every generation new mutants  
202 entered the population via binomial sampling from the wild-type population with probability  $u$ .  
203 Migration was also modeled as a binomial sampling from the local populations, where migrants  
204 from each deme  $i$  are sampled with probability  $m_{ij}$  ( $i, j \in \{1, 2\}$ ,  $i \neq j$ ). Density regulation  
205 was applied only to deme 2 when  $t < \theta$  (non-deteriorated deme), and consisted in bringing the  
206 deme back to carrying capacity at the end of the generation. The genetic composition of the  
207 regulated deme was composed by binomial sampling, thus maintaining wild types and mutants  
208 in the non-perturbed deme at the same frequency that they reached after reproduction, mutation  
209 and migration. We run the simulation for two epochs of  $\theta$  generations and add a burn-off period  
210 of 500 generations. Rescue was attained if at any moment during the simulation the number of  
211 mutants reaches  $K_{\text{tot}}/2$ . We performed 2000 replicates for each parameter combination, and the  
212 probability of rescue is calculated as the proportion of replicates in which rescue occurred.



## 213 Data availability

214 The source code for our simulations is available at the GitHub repository [https://github.com](https://github.com/mtomasini/EvolutionaryRescue)  
215 /mtomasini/EvolutionaryRescue.

## 216 Results

### 217 Probability of rescue if mutations are lethal in the old environment

218 We start by evaluating (2) for the symmetric case where  $\kappa_1 = \kappa_2 = \kappa$  and  $m_{12} = m_{21} = m/2$ .  
219 Furthermore, we assume that the mutation is lethal in the old environment ( $s = 1$ ), hence each  
220 rescue event will result from a *de novo* mutation. This allows us to outline our main results in  
221 a simple model and to provide some intuition about the involved mechanisms at play. We relax  
these assumptions later. Figure 2A shows the total probability of rescue (equation (2)) as a func-

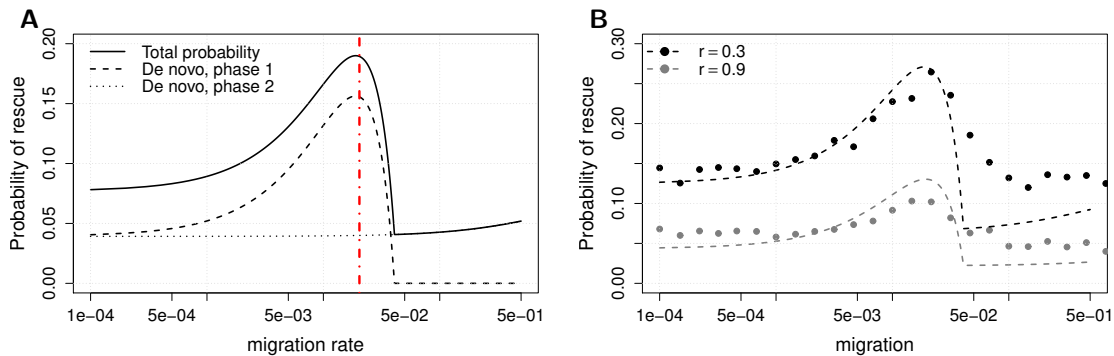

Figure 2: (A) The total probability of rescue and its decomposition in terms of *de novo* mutations during phases 1 and 2. The red vertical line represents the theoretical limit beyond which gene swamp disrupts rescue in phase 1. Parameters are  $z = 0.02$ ,  $s = 1.0$ ,  $r = 0.5$  and  $\theta = 500$ . (B) Comparison between simulations and prediction (equation 2), parameters are  $z = 0.02$ ,  $s = 1.0$  and  $\theta = 500$ , in black  $r = 0.3$  and in gray  $r = 0.9$ .

222  
223 tion of the migration rate, as well as the decomposition into mutations occurring during and after  
224 the deterioration of the environment. We observe that the probability of rescue with respect to  
225 migration is maximized for an intermediate migration rate for the parameter values used in Figure  
226 1. This is consistent with previous results [Uecker et al., 2014]. The existence of an optimal inter-  
227 mediate migration rate reflects two effects that are at play here. On one hand the non-deteriorated  
228 deme acts as a source of wild-type individuals, preventing extinction in deme 1, thus increasing  
229 the chance for rescue to occur. On the other hand, too much migration between demes prevents  
230 rescue mutations from establishing despite being positively selected in one of the two demes, a  
231 process called gene swamping [Bulmer, 1972, Lenormand, 2002, Tomasini and Peischl, 2018] (Fig.  
232 2, also see the discussion in the last section of Appendix A in the supplemental material). The limit  
233 beyond which gene flow causes swamping is  $m > zs/(s-z)$  (see red line in Fig. 2A) [Bulmer, 1972,  
234 Lenormand, 2002, Tomasini and Peischl, 2018]. Hence, for large migration rates, rescue can only

235 occur during phase 2. In addition to these two processes, increasing the migration rate should also  
236 lead to an increased flux of individuals moving from deme 2 to deme 1, which would increase the  
237 total wild-type population size at the beginning of phase 2 (see supplemental material, Appendix  
238 A). Thus, we expect a mild positive effect on evolutionary rescue during phase 2 when increasing  
239  $m$  (Fig. 2, also supplementary material, fig. S1). The mild positive effect of large migration during  
240 phase 2 stems from the fact that at time  $t = \theta$  the number of individuals in deme 1, maintained  
241 exclusively by the influx of individuals from deme 2, increases with increasing migration rate (see  
242 supplemental material, Appendix A), the two demes behaving like one population. Because a  
243 larger population size increases the chance for rescue, our model predicts a slight increase of rescue  
244 for very large migration rates. This can be seen directly from equation (7).

245 Figure 2B shows comparison with simulations and reveals a very good fit of our analytical approx-  
246 imation for low to intermediate migration rates. For large migration rates, however, we underesti-  
247 mate the true probability of rescue. This is because we ignore the temporal change of the fitness  
248 of rescue mutations. In particular, we underestimate the establishment probabilities of mutations  
249 that occur at the end of phase 1, just before the environment in deme 2 deteriorates. Our ap-  
250 proximation ignores this change in environmental conditions in deme 2 and hence assumes that  
251 individuals carrying mutations that occurred during phase 1 will be counter-selected in deme 2,  
252 even during phase 2 when they are actually positively selected in that deme. This effect is negli-  
253 gible for small migration rates but can have considerable effect for large migration rates. Because  
254 our model underestimates the rescue chance for migration rates slightly larger than the swamping  
255 limit, this might also explain why we do not see an increase in the chance for evolutionary rescue  
256 for very large migration rates in simulations.

257 Importantly, the probability of survival for  $m \rightarrow 0$ , as well as the optimal intermediate migration  
258 rate that maximizes the chance of rescue are correctly estimated by equation (2), at least for mu-  
259 tants with a large initial disadvantage  $s$  (Figs. S6A, S7A and S8). For small  $s$  and small  $\theta$ , the  
260 temporal inhomogeneity in selection coefficients becomes more important, as mutations may take  
261 a long time to escape drift and eventually establish. This effect is weak for small migration rates,  
262 but with high migration rates, a relatively large number of mutants in deme 2 will be displaced to  
263 deme 1 where their establishment probability will increase (*e.g.* see fig. S4).

264 Another effect that we have ignored in our model is the increase in probability of rescue for high  
265 migration rates due to what Uecker et al. [2014] called “relaxed competition”. Density regulation in  
266 the non-deteriorated deme fills the habitat to carrying capacity at the end of each generation. For  
267 high migration rates, the non-deteriorated deme is strongly depleted and density regulation can  
268 increase the total number of mutants in a single generation (*e.g.* see figure S3 in the supplemental  
269 material to see the relaxed competition in a case without *de novo* mutations).

## 270 **When does intermediate migration favor rescue?**

271 A key unresolved question for evolutionary rescue in structured populations is: when does gene  
272 flow facilitate evolutionary rescue as compared to two populations in isolation? Our model allows

273 us to derive a condition for when intermediate migration helps chances of survival (as compared  
274 to no migration at all) by calculating when the derivative of  $P_{\text{dn}}^1$  (that is, the probability of rescue  
275 due to *de novo* mutations during phase 1) with respect to  $m$  at  $m = 0$  is positive. This is the case  
276 if (see supplemental material, Appendix B)

$$\frac{1}{z} \lesssim r\theta. \quad (11)$$

277 Thus, our model predicts that gene flow has a positive effect on evolutionary rescue if rescue muta-  
278 tions are strongly beneficial in the deteriorated environment ( $z > 0$ ), respectively, if environmental  
279 change occurs slowly across demes (large  $\theta$ ), and/or if the new environment is very harsh (large  
280  $r$ ). The left hand side (11) simply quantifies the strength of positive selection. A larger selection  
281 coefficient of a rescue mutation increases the fitness gain of a mutant migrant that moves into  
282 the deteriorated deme. The right-hand side of condition (11) relates the strength of selection to  
283 the impact of demographic dynamics. Both  $\theta$  and  $r$  influence the imbalance in population density  
284 between the two demes: the strength of stress,  $r$ , determines both the rapidity of decay of the  
285 population size in deme 1 as well as the equilibrium density of the population (see equation (9)  
286 and Fig. 1, as well as equation (S5) in Appendix A of the supplemental material). The length of  
287 an epoch  $\theta$  determines the length of the period where deme 1 has a small population size relative to  
288 deme 2 such that gene flow is more likely to bring mutants into the deme where they are adapted  
289 to, rather than removing them from the deme where they can establish. Hence a long deterioration  
290 time or high stress extends the period where population size is low in deme 1 and large in deme 2,  
291 which is when gene flow has positive effects on rescue.

292 Figure 3 shows the comparison between analytical model and simulation for different combinations  
293 of parameters. In the first row  $1/z \geq r\theta$ , and as predicted by theory we observe that simulations  
294 show a roughly constant probability of rescue over the range of the migration rate  $m$ . A small  
295 increase in the probability of rescue can be observed as  $\theta$  increases (from left to right), in partic-  
296 ular in the top-right plot ( $1/z = r\theta$ ). This increase is clearly observed in all subsequent rows (for  
297 higher  $z$ , top to bottom), confirming that condition (11) predicts when gene flow will facilitate  
298 evolutionary rescue.

## 299 Non-lethal rescue mutations

300 If we consider only *de novo* mutations, eq. (11) can be readily generalized to non-lethal mutations  
301 and becomes

$$\frac{s}{z} \lesssim r\theta, \quad (12)$$

302 as is shown in the supplemental material (Appendix B). Note that this includes the condition  
303 (11) for lethal mutations as a special case if  $s = 1$ . If rescue mutations are sub-lethal or only  
304 slightly deleterious ( $s < 1$ ), the range of parameters for which gene flow facilitates evolutionary  
305 rescue increases. Migration is less detrimental because a mutant experiences a milder change in  
306 fitness when migrating from one deme to another. This is sensible as gene swamping is less likely

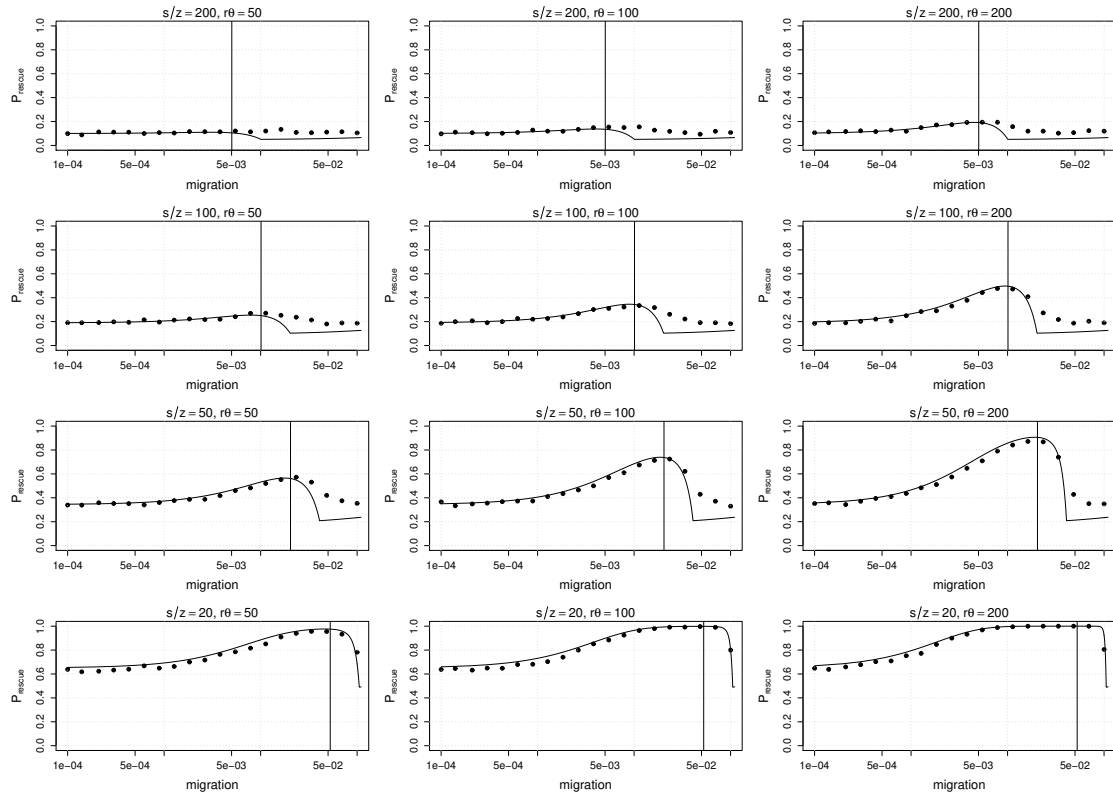

Figure 3: Evolutionary rescue for different combinations of parameters: first row  $z = 0.005$ , second row  $z = 0.01$ , third row  $z = 0.02$ , fourth row  $z = 0.05$ ; left column  $\theta = 500$ , center column  $\theta = 1000$ , right column  $\theta = 2000$ . In all figures,  $r = 0.1$ ,  $s = 1.0$ . The vertical black line in each figure is the limit for swamping,  $sz/(s - z)$ . In the top two rows, we can see that passing from a situation where  $s/z > r\theta$  to one where  $s/z < r\theta$  makes the optimal migration rate more and more important. More extreme differences (e.g. third row, right column) yield a higher probability of evolutionary rescue at the optimal migration rate.

307 if mutations are less deleterious in the environment to which they are not adapted [Bulmer, 1972,  
308 Lenormand, 2002, Tomasini and Peischl, 2018].

309 Unless the selective disadvantage  $s$  of rescue mutations is very large, rescue mutations will generally  
310 be present at low frequencies in the population before the deterioration of the environment. We  
311 thus need to account for the contribution of standing genetic variation to the probability of rescue  
312 (figure 4). We can see that the chances of survival from standing mutations are maximal in  
313 absence of migration (figure 4, also figure S3A). The reason is the following: a mutation in deme  
314 1 at  $t = 0$  will have higher chances of surviving compared to a mutation in deme 2, where it is  
315 counter-selected, that is,  $p^{(1)} > p^{(2)}$  for any combination of parameters. Further, because  $p^{(1)}$   
316 is monotonically decreasing [Tomasini and Peischl, 2018],  $P_{\text{sgv}}$  tends to decrease with increasing  
317 migration rates (except if  $s$  is small and  $m$  is large, see Figure S3B). By adding the contribution  
318 of standing genetic variation (as calculated with (5)) the equivalent of condition (12) yields

$$\frac{s}{z} < \frac{e^{r\theta} r (f_0 + u\theta)}{e^{r\theta} (f_0 r + u) - u} \quad (13)$$

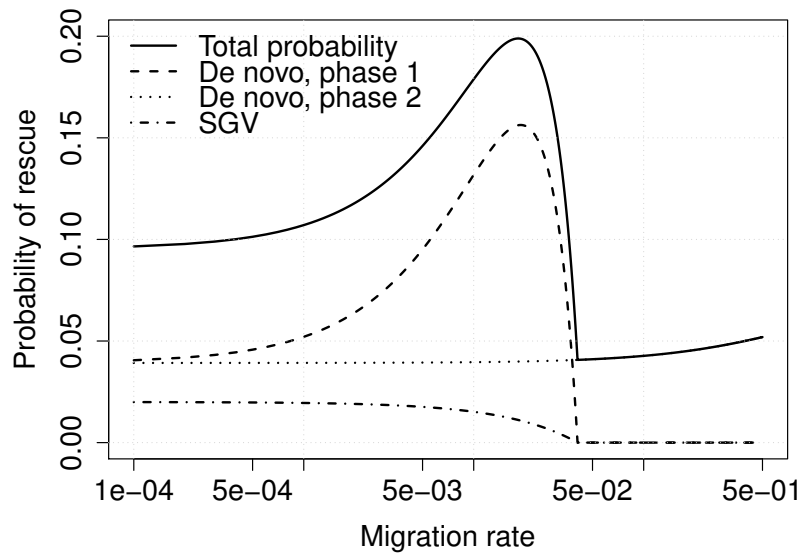

Figure 4: We show the total probability of rescue and its decomposition in terms of *de novo* mutations during phases 1 and 2, and standing genetic variation. Parameters are  $z = 0.02$ ,  $s = 0.5$ ,  $r = 0.5$ ,  $\theta = 500$  and  $f_0 = u/s$  (*i.e.* at mutation-selection equilibrium).

319 For  $f_0 = 0$ , we recover equation (S11) in the supplemental material (Appendix B), which is in turn  
 320 approximated to (12). When  $f_0$  increases, the right-hand part of (13) decreases, and gene flow  
 321 loses importance. In fact, since  $P_{\text{sgv}}$  is monotonically decreasing with increasing migration rate  
 322  $m$ , standing genetic variation only matters for small to intermediate migration rates. Standing  
 323 mutations will establish during phase 1 and are hence subject to gene swamping. Thus, if standing  
 324 genetic variation is the predominant source of rescue mutations, gene flow is unlikely to have  
 325 positive effects on rescue.

326 Figure S4 shows comparison between simulations and theoretical expectations for different values  
 327 of  $s$  (with standing genetic variation). Our approximation is again very accurate for small value  
 328 of  $m$ , whereas simulations and analytical approximations disagree for larger values of  $m$ . This  
 329 disagreement is more pronounced for small values of  $s$ . This is due to new mutants that will spread  
 330 so slowly that they will reach high frequencies only during phase 2, when both environments are  
 331 deteriorated. The contribution of these mutants to the probability of rescue, however, is calculated  
 332 through their probability of establishment in phase 1, which does not account for the temporal  
 333 change in fitness of rescue mutations at time  $\theta$ . The discontinuity between  $p^{(i)}(t < \theta)$  and  $p^{(i)}(t > \theta)$   
 334 causes our approximation to underestimate the probability of rescue, especially for large migration  
 335 rates. Along these lines we also find that (13) is not accurate for small values of  $s$  (e.g.,  $s = 0.1$  in  
 336 Figure S4). The analytical theory for standing genetic variation becomes accurate for sub-lethal  
 337 mutations with a large selective disadvantage (e.g. Figure S8,  $z = 0.02$ ,  $s = 0.5$ ,  $r = 0.5$ ,  $\theta = 500$ ,  
 338 and  $s/z = 25 < 250 = r\theta$ ).

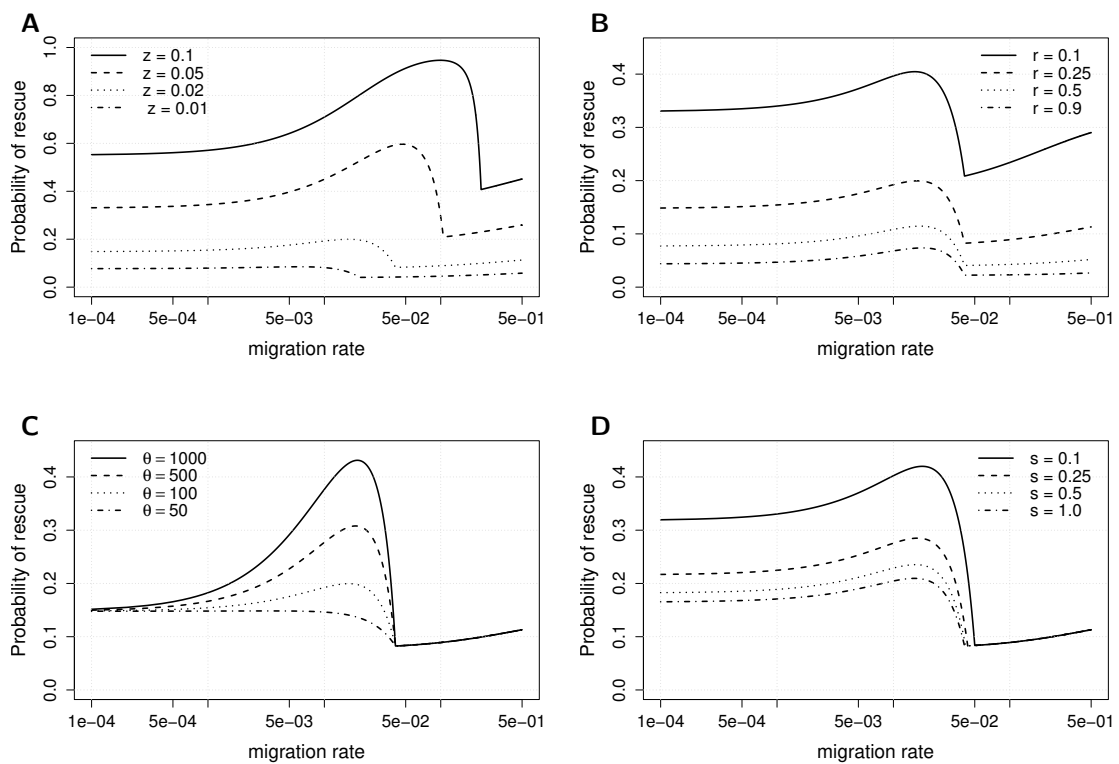

Figure 5: Total probability of rescue as a function of different parameters. When not otherwise stated in the legend, parameters are  $z = 0.02$ ,  $s = 1.0$ ,  $r = 0.25$ ,  $\theta = 200$ . (A) Variation with  $r$ , (B) variation with  $\theta$ , (C) variation with  $z$ , (D) variation with  $s$  (and no standing genetic variation).

### 339 Effects of the parameters of the model

340 Figure 5 illustrates the influence of various parameters on the probability of rescue. Increasing  
341  $z$  has the main effect of increasing the probability of rescue, because a more beneficial mutation  
342 clearly has a larger chances of surviving (Figure 5A). At the same time, the optimal migration  
343 rate (when it exists) increases with increasing  $z$ . The reason is that the critical migration rate  
344 beyond which gene swamping occurs increases with increasing  $z$ : the condition for gene swamping  
345 is  $m > sz/(s - z)$  [Bulmer, 1972, Lenormand, 2002, Tomasini and Peischl, 2018]. For  $z \ll 1$ , this  
346 reduces to  $m \gtrsim z$ , which thus allows establishment to occur for larger  $m$ . Decreasing the strength  
347 of environmental stress,  $r$ , leads to a higher overall probability of rescue because population sizes  
348 decline more slowly, leaving more time for rescue to occur (Figure 5B). The critical threshold  
349 at which swamping occurs remains unaffected, as it depends on the ratio between  $z$  and  $m$  only  
350 [Tomasini and Peischl, 2018]. Increasing  $\theta$  extends the length of phase 1, which can increase the  
351 probability of rescue dramatically for intermediate migration rates but not for low or high migra-  
352 tion rates (Figure 5C). For low migration rates, the length of phase 1 has very little impact since  
353 the two demes evolve almost independently. For strong migration, the length of phase 1 does not  
354 matter, because swamping prevents the establishment of rescue mutations during phase 1. Figure  
355 5D shows that decreasing the deleterious effect of rescue mutations  $s$  has a similar effect on the  
356 probability of evolutionary rescue from *de novo* mutations as increasing  $\theta$ . Decreasing  $s$  also af-  
357 fects the critical migration rate beyond which gene swamping occurs [Bulmer, 1972, Tomasini and  
358 Peischl, 2018], but this effect is rather weak. This can be seen if we rewrite the condition for gene  
359 swamping as  $m > z/(1 - z/s)$ . In particular, if  $z < s$ , the effect of  $s$  becomes negligible.

360

### 361 Asymmetric carrying capacities and migration rates

362 We next consider the effect of asymmetric migration rates or asymmetric carrying capacities. For  
363 better comparison across models (see *e.g.* Barton et al. [2002]) and without loss of generality, we  
364 introduce two new parameters  $\zeta$  and  $\beta$  that measure the degree of asymmetry:

$$m_{12} = \zeta m, \quad m_{21} = (1 - \zeta)m, \quad (14)$$

365

$$\kappa_1 = \beta K_{\text{tot}}, \quad \kappa_2 = (1 - \beta)K_{\text{tot}}. \quad (15)$$

366 With these definitions, the model is symmetric with respect to migration rates if  $\zeta = 0.5$  and  
367 carrying capacities if  $\beta = 0.5$ . For  $\zeta < 0.5$ , migration from deme 1 to deme 2 is smaller, while  
368 the opposite is true when  $\zeta > 0.5$ . Figure 6A shows the probability of rescue as a function of  $m$   
369 for different values of  $\zeta$ . For  $\zeta = 0.9$ , deme 2 receives many more migrants than it sends out, as  
370 compared to the symmetric model. The main effect of this asymmetry in migration is to decrease  
371 the total probability of rescue because rescue mutations are more likely to be removed from the  
372 deme to which they are adapted to as compared to the symmetric case. Further, gene swamping

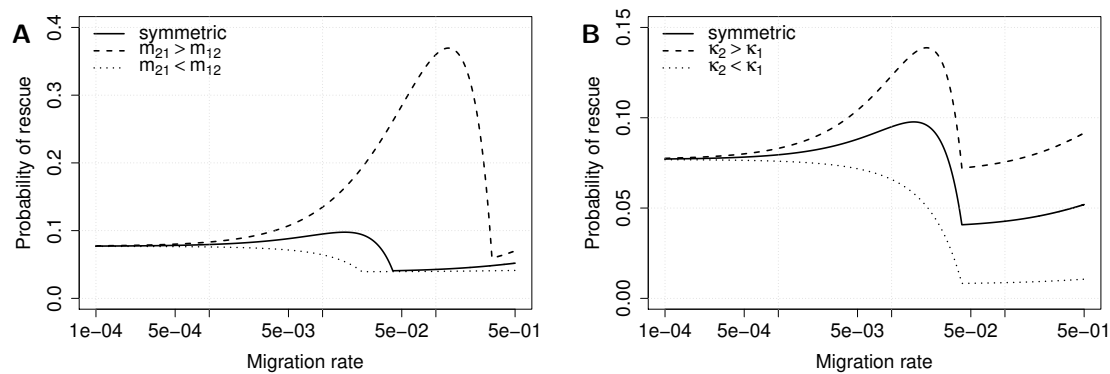

Figure 6: Probability of rescue as a function of migration for different sets of parameters and without standing genetic variation.  $z = 0.02$ ,  $s = 0.5$ ,  $r = 0.5$ ,  $\theta = 100$ , (A)  $\zeta = 0.1, 0.5, 0.9$ , (B)  $\beta = 0.1, 0.5, 0.9$ .

373 happens for lower values of  $m$  [Bulmer, 1972], thus reducing any beneficial effects of gene flow. The  
 374 opposite is true for  $\zeta = 0.1$ : wild-type individuals are removed at a smaller rate from the deme they  
 375 are adapted to, which increases the chances of survival. At the same time, gene swamping occurs  
 376 for larger values of  $m$  with respect to the symmetric case. The reduced effect of gene swamping  
 377 with decreasing  $\zeta$  also becomes apparent from the increase of the migration rate that maximizes  
 378 the chance for evolutionary rescue. Figure S6A and S7A show comparison with simulations for *de*  
 379 *novo* mutations and standing genetic variation with asymmetric migration rates.

380 We next keep migration rates symmetric, such that  $m_{12} = m_{21} = m/2$ , and investigate the effect  
 381 of asymmetries in carrying capacities. Figure 6B shows the probability of rescue as a function of  
 382  $m$  for different  $\beta$ . We are going to call deme 2 “the reservoir”, as during phase 1 it is left untouched  
 383 and it never goes extinct. We observe that a larger reservoir yields higher probability of rescue,  
 384 and *vice versa*, when a reservoir is smaller the probability of rescue decreases. This is mainly  
 385 due to *de novo* mutations during the second phase. Hence, chances of new mutants to establish  
 386 increase because there are more wild-type individuals to start with at  $t = \theta$ . When it exists, the  
 387 optimal migration rate remains the same as in the symmetric model, even though it yields higher  
 388 chances of survival for a larger reservoir. Figures S6B and S7B show comparison with simulations  
 389 for *de novo* mutations and standing genetic variation with asymmetric carrying capacities. The  
 390 condition for when gene flow facilitates evolutionary rescue from *de novo* mutations as compared  
 391 to no migration becomes (see supplemental material, Appendix B)

$$\frac{s}{z} \lesssim Fr\theta, \quad (16)$$

392 where

$$F = \frac{m_{21} \kappa_2}{m_{12} \kappa_1}. \quad (17)$$

393 Condition (16) generalizes conditions (11) and (12) (it is also easy to generalize condition (13),  
 394 as shown in the supplementary information, Appendix B, (S10)). This reflects the dynamics of a



395 source-sink scenario. When deme 2 is large – the source is large – it sends many wild types to the  
396 sink, where new mutants could arise and prosper. The same happens if immigration in deme 1,  
397  $m_{21}$ , is large. In extreme cases, when  $\kappa_1 < m_{21}\kappa_2$ , immigration in deme 1 causes overflow. This  
398 corresponds to a situation in which the population in a sink (in this case in deme 1) does not  
399 decline until the reservoir (deme 2) becomes deteriorated. On the other hand, since what matters  
400 most for ultimate rescue is the number of mutants, this high rate of migration also causes purifying  
401 selection in deme 1, not allowing any mutant to survive for long.  
402 Figure S8 in the supplemental material (Appendix D) shows a comparison between theoretical  
403 expectations and simulations for asymmetric scenarios, revealing a good fit for small to intermediate  
404 migration rates.

### 405 **The role of density regulation**

406 So far we have assumed that density regulation keeps the unperturbed deme at carrying capacity at  
407 all times. This requires sufficiently high local growth rates so that any reduction of the populations  
408 size due to emigration is immediately compensated by rapid growth within the unperturbed deme.  
409 This has the advantage that we do not need to model density regulation explicitly and is the  
410 same kind of density regulation as described in [Uecker et al., 2014]. We relax this assumption  
411 by assuming Beverton-Holt dynamics [Beverton and Holt, 1957] in the unperturbed deme: this  
412 means that the number of individuals  $N_l$  of each type  $l$  (wild types or mutants,  $l \in \{\text{wt}, \text{m}\}$ ) in  
413 the non-deteriorated deme in the next generation will follow

$$N_l(t+1) = N_l(t) \frac{w_l^{(o)} \rho}{(1 + (\rho - 1)N_{\text{tot}}(t)/\kappa)}, \quad (18)$$

414 where  $\rho$  denotes the growth rate of the population,  $N_{\text{tot}}(t)$  the total number of individuals in the  
415 deme, and  $w_l^{(o)}$  the fitness of individuals of type  $l$ . Differences between the two modes of density  
416 regulation are summarized in the supplemental material (Appendix C). We performed simulations  
417 of this model and compare the outcomes to the model with instantaneous growth (Figure 7). In  
418 all considered cases, the two modes of density regulation do not show any difference for low to  
419 intermediate migration rate. This is not surprising, as emigration affects the total number of  
420 individuals in the unperturbed deme only mildly, and even small values of  $\rho$  ensure that carrying  
421 capacity is maintained. For intermediate to large migration rates, however, the behavior can change  
422 dramatically (Figure 7). In particular, our simulations show that for large migration rates, the  
423 probability of rescue can be much lower if the growth rate  $\rho$  is small. To understand this behavior,  
424 let us first consider the case where population growth is instantaneous. The source population  
425 (unperturbed deme) is constantly losing individuals due to emigration into the sink population  
426 (perturbed deme). As a consequence, population growth will increase the absolute fitness of the  
427 remaining individuals in the source population [Tomasini and Peischl, 2018]. Thus selection in  
428 the unperturbed deme is less efficient as compared to the case without gene flow. The increase of  
429 the probability of rescue as  $m$  increases is due to relaxed competition and has been demonstrated

430 formally in a two-deme model with source-sink dynamics [Tomasini and Peischl, 2018]. But if  
 431 density regulation is logistic and growth rates are small, the advantage of relaxed competition  
 432 disappears as emigration removes individuals more quickly than they can be reproduced. In this  
 433 case we would expect that the probability of rescue starts to decline once the migration rate  
 434 exceeds the critical value beyond which population growth can no longer maintain the population  
 435 at carrying capacity. To calculate this critical migration rate, we approximate the net loss of  
 436 individuals due to migration in deme 2 by solving

$$N_2(t+1) \approx N_2(t) \left(1 - \frac{m}{2}\right) \frac{\rho}{1 + (\rho - 1)N_2(t)/\kappa_2}. \quad (19)$$

437 Note that in this calculation we neglect the number of individuals coming from deme 1 and all  
 438 the mutant individuals. The evolution of the individuals in deme 2 is calculated explicitly in the  
 439 supplemental material (see Appendix C, equation (S14)). Now, extinction occurs when  $N_2(t) = 0$   
 440 for some  $t > 0$ . This happens when

$$\rho \left(1 - \frac{m}{2}\right) \leq 1, \quad (20)$$

441 or when the product of the rate of growth and the rate of migration (loss) is smaller than 1. We  
 442 should note that relation (20) is a conservative limit. As we do not take into account the presence  
 443 of mutants, but only the net loss of wild-type individuals, this result does not account for the  
 444 possibility of having a mutant establishing in the first generations after the deterioration event,  
 445 as it is often the case [Peischl and Kirkpatrick, 2012]. The vertical lines in Figure 7 indicate this  
 446 critical migration rates and confirm our intuitive explanation above.

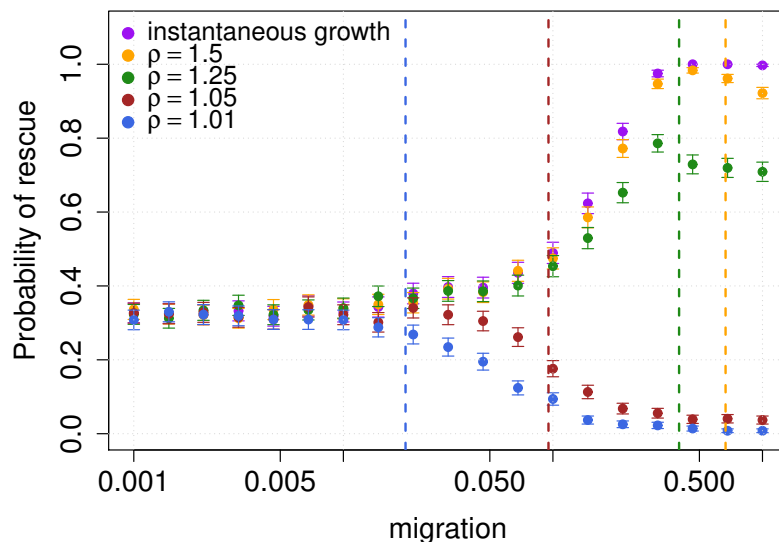

Figure 7: Comparison between different types of density selection for harsh changes over short periods. Here,  $z = 0.02$ ,  $s = 0.1$ ,  $r = 0.9$  and  $\theta = 100$ . The vertical lines show the critical migration rate for which equation (20) holds. Points and lines in blue refer to  $\rho = 1.01$ , in green  $\rho = 1.25$ , in orange to  $\rho = 1.5$  and we show hard density regulation in purple.

447 Hence, density regulation can reduce the beneficial effects of gene flow if the growth rate  $\rho$  is  
448 not large enough such that the unperturbed deme does not remain at carrying capacity, and there  
449 is no relaxed competition. Even when there is the potential for relaxed competition in terms of  $s$ ,  $r$   
450 and  $\theta$  (see [Uecker et al., 2014]), a slower growth rate lowers the chances of rescue for intermediate  
451 migration rates and higher (see figure 7). Ultimately, small growth rate  $\rho$  disrupts all effects due  
452 to migration and allows gene swamping to occur more readily. This is sensible, as low growth  
453 rate means that there will be fewer individuals in deme 2 and migration is mainly detrimental to  
454 the establishment of rescue mutations and also reduces the population size that can contribute to  
455 evolutionary rescue.

456

## 457 Discussion

458 We studied a model for evolutionary rescue in a structured population using recent analytical re-  
459 sults for establishment probabilities in structured populations [Tomasini and Peischl, 2018]. Our  
460 main result is an analytical prediction for the conditions under which gene flow facilitates evo-  
461 lutionary rescue in structured populations as compared to a population without gene flow. The  
462 potentially positive effect of gene flow on evolutionary rescue has been described previously both  
463 experimentally and theoretically; experimentally during adaptation to a gradient of salinity in  
464 a yeast meta-population [Gonzalez and Bell, 2013], mathematically in a model for evolutionary  
465 rescue in structured populations [Uecker et al., 2014], and via simulations of the evolution of treat-  
466 ment resistance in solid tumours [Waclaw et al., 2015]. These findings are in contrast to the fact  
467 that dispersal does generally not have a positive effect on (local) adaptation [Bulmer, 1972, Holt  
468 and Gomulkiewicz, 1997, Lenormand, 2002] in populations with more stable demographic scenar-  
469 ios, and the conditions for when gene flow facilitates survival in the face of drastic environmental  
470 change were previously not known. Our study fills this gap and provides surprisingly simple and  
471 intuitive conditions for when we expect positive effects of gene flow on survival via adaptation.  
472 Furthermore, our model allowed us to describe the interactions between density regulation, demo-  
473 graphic dynamics and gene flow during adaptation to severe environmental stress.

474 We showed that the probability of evolutionary rescue from *de novo* mutations will be maximized  
475 for a migration rate  $m > 0$  if  $s/z < r\theta$ , where  $r$  describes the harshness of the new environ-  
476 ment,  $\theta$  the speed of environmental change,  $s > 0$  is the cost of carrying a rescue mutation in  
477 the original environment (e.g., the cost of having an antibiotic mutation in the absence of antibi-  
478 otics), and  $z > 0$  is the selective advantage of a rescue mutation in harsh environments (e.g., the  
479 advantage of carrying an antibiotic resistance mutation in the presence of antibiotics). Thus, our  
480 model predicts that gene flow has a positive effect on evolutionary rescue if (i) rescue mutations  
481 are strongly beneficial/weakly deleterious in the deteriorated/original environment, respectively, if  
482 (ii) environmental change occurs slowly across demes (large  $\theta$ ), and/or if (iii) the new environment  
483 is very harsh (large  $r$ ). We then extended this result to account for the effects of standing genetic

484 variation, asymmetry in carrying capacities and the direction of gene flow between demes. Finally,  
485 we investigate the details of density regulation and find that they strongly affect whether gene flow  
486 will facilitate survival or not. In particular, if local growth rates in unperturbed demes are so low  
487 that carrying capacities cannot be maintained due to emigration of individuals, positive effects of  
488 gene flow diminish. The predictions that we derive from the model are corroborated by stochastic  
489 simulations.

490 Our results show that the main positive effect of gene flow is during phase 1, *i.e.* during the epoch  
491 in which only one deme is deteriorated. Gene flow from the unperturbed deme into the perturbed  
492 deme provides the raw material which can increase the chance of evolutionary rescue as compared  
493 to two populations without gene flow. This phenomenon has recently been formally studied in a  
494 two-deme model with divergent selection, where gene flow can be beneficial to the rate of establish-  
495 ment of locally adapted mutations [Tomasini and Peischl, 2018]. This is reflected in the equation  
496  $s/z < r\theta$ ; the stronger the source-sink dynamics of the unperturbed and perturbed habitat (large  
497  $r$ ) and the longer these source-sink dynamics last (large  $\theta$ ), the more likely it is that gene flow is  
498 beneficial for evolutionary rescue. This effect is further amplified if carrying capacities or gene flow  
499 is asymmetric such that more individuals migrate from the unperturbed to the perturbed habitat  
500 ( $F > 1$  in eq. (16)). Our model matches the results found by Uecker et al. [2014], in particular in  
501 the range where gene swamping does not occur (see Fig. S2 for a direct comparison).

502 We found that interactions between gene flow and density regulation play an important role. Ulti-  
503 mately, when the growth rate  $\rho$  of the wild type in deme 2 is large enough to compensate emigration  
504 to deme 1, the system remains in a source-sink scenario (see *e.g.* Gomulkiewicz et al. [1999]) and  
505 gene flow can be beneficial for evolutionary rescue. Furthermore, if the growth rate is very large,  
506 we observe relaxed competition (see also Uecker et al. [2014]) which can counter the negative effects  
507 of rescue mutations in the unperturbed habitat. If, however, gene flow depletes individuals too  
508 quickly in the unperturbed deme such that density regulation cannot replace these individuals, the  
509 positive effects of gene flow disappear (Figure 7).

510 It has been argued that standing genetic variation, along with initial population density, is the  
511 main factor determining the chances of evolutionary rescue [Gomulkiewicz and Holt, 1995, Barrett  
512 and Schluter, 2008, Agashe et al., 2011, Lachapelle and Bell, 2012, Ramsayer et al., 2013, Van-  
513 der Wal et al., 2013]. While we find that this is the case in the absence of gene flow or if gene flow  
514 is very high, we also find that the contribution of *de novo* mutations can dwarf the contribution  
515 of standing variation for intermediate migration rates (see *e.g.*, Figure 2). Also, we find that not  
516 only the initial size of the total population plays a major role, but also the variation in population  
517 densities across habitats (Figure 6).

518 The main short-coming of our approach is the inability to account correctly for the time-inhomogeneity  
519 of selective coefficients of wild-type and mutant individuals. This becomes critical for mutants aris-  
520 ing just before the second deterioration event, as their probability of establishment will be closer  
521 to  $2z$  than the approximation we used. This discrepancy increases with increasing migration rate  
522 (see eqs. (3) and (4)) and decreasing  $s$  (as slightly deleterious mutations are less likely to be

523 purged before time  $\theta$ ). Hence, for slightly deleterious mutations our model underestimates the  
524 probability of rescue (see figure S4). It would be interesting to generalize our approach in such  
525 a way to account correctly for time-inhomogeneous selective coefficients, which could be achieved  
526 by fusing the approaches of Peischl and Kirkpatrick [2012] and Tomasini and Peischl [2018]. This  
527 is, however, a mathematically challenging endeavour and beyond the scope of this paper. Another  
528 interesting extension of our model would be to account for more than two demes. This would allow  
529 us to study different modes of dispersal, e.g., island models vs. stepping stone model, and could  
530 help to explain experimental findings that show that the mode of dispersal can strongly influence  
531 a population's chance of survival [Bell and Gonzalez, 2011].

532 In our analysis, we assumed mutations that establish in isolation from other genetic events that  
533 may interfere with the process (*e.g.* clonal interference, [Gerrish and Lenski, 1998]). Therefore, we  
534 expect our results to hold in species reproducing sexually with strong recombination. In diploid  
535 individuals, the degree of dominance of rescue mutations may impact the evolutionary dynamics  
536 or rescue mutations. If mutations are co-dominant or partially recessive, our results can be carried  
537 over to diploid models by redefining our parameters  $s$  and  $z$  as the fitness effects of mutations  
538 in heterozygotes in the two environments. By excluding competition with concurrent mutations  
539 from our analysis, we expect this model to be less predictive for organisms reproducing with low  
540 recombination rates - or for mutations occurring in regions with low recombination rate. However,  
541 some of our results could still be valuable, as many of the effects that we described depend strongly  
542 on ecological aspects (such as carrying capacities, growth rate, migration rate) and evolutionary  
543 rescue focuses on relatively short periods such that co-segregation of multiple mutations seems  
544 unlikely.

545 Our approach could help improve understanding some of the results found in experimental se-  
546 tups (*e.g.* Bell and Gonzalez [2011]) and in theoretical investigations (*e.g.* Uecker et al. [2014])  
547 about the effects of dispersal on the probability of evolutionary rescue. The simple and intuitive  
548 analytical predictions are imperative for our understanding of evolutionary rescue in structured  
549 populations and help us sharpen our intuition about the interactions of ecological and evolutionary  
550 process on short time-scales. A setup similar to the one proposed by Bell and Gonzalez [2011],  
551 with sub-populations of yeast exposed to a gradient of salt changing in time would be ideal to test  
552 our predictions.

## 553 Acknowledgements

554 We thank Mark Kirkpatrick, Sally Otto and Katie Peichel for stimulating discussions on this  
555 subject. We also thank Joachim Hermisson and Laurent Excoffier for helpful comments on the  
556 first manuscript. We gratefully acknowledge helpful comments from Claudia Bank, as well as three  
557 anonymous reviewers.

558

## 559 Conflict of interest disclosure

560 The authors of this pre-print declare that they have no financial conflict of interest with the content  
561 of this article.

## 562 References

- 563 D. Agashe, J. J. Falk, and D. I. Bolnick. Effects of founding genetic variation on adaptation to a  
564 novel resource. *Evolution: International Journal of Organic Evolution*, 65(9):2481–2491, 2011.
- 565 M. V. Ashley, M. F. Willson, O. R. Pergams, D. J. O’Dowd, S. M. Gende, and J. S. Brown.  
566 Evolutionarily enlightened management. *Biological Conservation*, 111(2):115–123, 2003.
- 567 R. D. Barrett and D. Schluter. Adaptation from standing genetic variation. *Trends in ecology &  
568 evolution*, 23(1):38–44, 2008.
- 569 N. H. Barton, F. Depaulis, and A. M. Etheridge. Neutral evolution in spatially continuous popu-  
570 lations. *Theoretical population biology*, 61(1):31–48, 2002.
- 571 G. Bell. Evolutionary rescue and the limits of adaptation. *Phil. Trans. R. Soc. B*, 368(1610):  
572 20120080, 2013.
- 573 G. Bell. Evolutionary rescue. *Annual Review of Ecology, Evolution, and Systematics*, 48:605–627,  
574 2017.
- 575 G. Bell and A. Gonzalez. Evolutionary rescue can prevent extinction following environmental  
576 change. *Ecology letters*, 12(9):942–948, 2009.
- 577 G. Bell and A. Gonzalez. Adaptation and evolutionary rescue in metapopulations experiencing  
578 environmental deterioration. *Science*, 332(6035):1327–1330, 2011.
- 579 R. J. H. Beverton and S. J. Holt. *On the dynamics of exploited fish populations*, volume 19 of 2.  
580 Ministry of Agriculture, Fisheries and Food, 1957.
- 581 L. M. Bono, C. L. Gensel, D. W. Pfennig, and C. L. Burch. Evolutionary rescue and the coexistence  
582 of generalist and specialist competitors: an experimental test. *Proceedings of the Royal Society  
583 B: Biological Sciences*, 282(1821):20151932, 2015.
- 584 E. C. Bourne, G. Bocedi, J. M. Travis, R. J. Pakeman, R. W. Brooker, and K. Schiffrers. Between  
585 migration load and evolutionary rescue: dispersal, adaptation and the response of spatially  
586 structured populations to environmental change. *Proceedings of the Royal Society B: Biological  
587 Sciences*, 281(1778):20132795, 2014.
- 588 M. Bulmer. Multiple niche polymorphism. *The American Naturalist*, 106(948):254–257, 1972.
- 589 O. Carja and J. B. Plotkin. Evolutionary rescue through partly heritable phenotypic variability.  
590 *Genetics*, pages 977–988, 2019.

- 591 S. M. Carlson, C. J. Cunningham, and P. A. Westley. Evolutionary rescue in a changing world.  
592 *Trends in Ecology & Evolution*, 29(9):521–530, 2014.
- 593 C. Chevillon, M. Raymond, T. Guillemaud, T. Lenormand, and N. Pasteur. Population genetics of  
594 insecticide resistance in the mosquito *Culex pipiens*. *Biological Journal of the Linnean Society*,  
595 68(1-2):147–157, 1999.
- 596 L.-M. Chevin, R. Gallet, R. Gomulkiewicz, R. D. Holt, and S. Fellous. Phenotypic plasticity in  
597 evolutionary rescue experiments. *Philosophical Transactions of the Royal Society B: Biological*  
598 *Sciences*, 368(1610):20120089, 2013.
- 599 C. De Mazancourt, E. Johnson, and T. Barraclough. Biodiversity inhibits species’ evolutionary  
600 responses to changing environments. *Ecology Letters*, 11(4):380–388, 2008.
- 601 P. J. Gerrish and R. E. Lenski. The fate of competing beneficial mutations in an asexual population.  
602 *Genetica*, 102(0):127, Mar 1998. ISSN 1573-6857. doi: 10.1023/A:1017067816551. URL <https://doi.org/10.1023/A:1017067816551>.  
603 [//doi.org/10.1023/A:1017067816551](https://doi.org/10.1023/A:1017067816551).
- 604 J. H. Gillespie. *Population genetics: a concise guide*. The John Hopkins University Press, 2004.
- 605 R. Gomulkiewicz and R. D. Holt. When does evolution by natural selection prevent extinction?  
606 *Evolution*, 49(1):201–207, 1995.
- 607 R. Gomulkiewicz and R. G. Shaw. Evolutionary rescue beyond the models. *Philosophical Trans-*  
608 *actions of the Royal Society B: Biological Sciences*, 368(1610):20120093, 2013.
- 609 R. Gomulkiewicz, R. D. Holt, and M. Barfield. The effects of density dependence and immigration  
610 on local adaptation and niche evolution in a black-hole sink environment. *Theoretical population*  
611 *biology*, 55(3):283–296, 1999.
- 612 A. Gonzalez and G. Bell. Evolutionary rescue and adaptation to abrupt environmental change  
613 depends upon the history of stress. *Philosophical Transactions of the Royal Society of London*  
614 *B: Biological Sciences*, 368(1610), 2013. ISSN 0962-8436. doi: 10.1098/rstb.2012.0079. URL  
615 <http://rstb.royalsocietypublishing.org/content/368/1610/20120079>.
- 616 J. B. S. Haldane. A mathematical theory of natural and artificial selection, part v: Selection and  
617 mutation. *Proc. Cambridge Phil. Soc.*, 23:838–844, 1927.
- 618 R. D. Holt. Population dynamics in two-patch environments: some anomalous consequences of an  
619 optimal habitat distribution. *Theoretical population biology*, 28(2):181–208, 1985.
- 620 R. D. Holt and R. Gomulkiewicz. How does immigration influence local adaptation? a reexami-  
621 nation of a familiar paradigm. *The American Naturalist*, 149(3):563–572, 1997.
- 622 D. Hughes and D. I. Andersson. Evolutionary trajectories to antibiotic resistance. *Annual Review*  
623 *of Microbiology*, 71:579–596, 2017.

- 624 M. Kirkpatrick and S. Peischl. Evolutionary rescue by beneficial mutations in environments that  
625 change in space and time. *Philosophical Transactions of the Royal Society B: Biological Sciences*,  
626 368(1610):20120082, 2013.
- 627 J. Lachapelle and G. Bell. Evolutionary rescue of sexual and asexual populations in a deteriorating  
628 environment. *Evolution: International Journal of Organic Evolution*, 66(11):3508–3518, 2012.
- 629 T. Lenormand. Gene flow and the limits to natural selection. *Trends in Ecology & Evolution*, 17  
630 (4):183–189, 2002.
- 631 S. Lion, V. A. Jansen, and T. Day. Evolution in structured populations: beyond the kin versus  
632 group debate. *Trends in ecology & evolution*, 26(4):193–201, 2011.
- 633 M. Lynch. Evolution and extinction in response to environmental change. *Biotic interactions and  
634 global change*, pages 234–250, 1993.
- 635 B. H. Normark and S. Normark. Evolution and spread of antibiotic resistance. *Journal of internal  
636 medicine*, 252(2):91–106, 2002.
- 637 H. A. Orr and R. L. Unckless. The population genetics of evolutionary rescue. *PLoS Genetics*, 10  
638 (8):e1004551, 2014.
- 639 M. M. Osmond and C. de Mazancourt. How competition affects evolutionary rescue. *Philosophical  
640 Transactions of the Royal Society B: Biological Sciences*, 368(1610):20120085, 2013.
- 641 S. Peischl and K. J. Gilbert. Evolution of dispersal can rescue populations from expansion load.  
642 *bioRxiv*, page 483883, 2018.
- 643 S. Peischl and M. Kirkpatrick. Establishment of new mutations in changing environments. *Genetics*,  
644 pages 895–906, 2012.
- 645 H. R. Pulliam. Sources, sinks, and population regulation. *The American Naturalist*, 132(5):652–  
646 661, 1988.
- 647 J. Ramsayer, O. Kaltz, and M. E. Hochberg. Evolutionary rescue in populations of *Pseudomonas*  
648 *fluorescens* across an antibiotic gradient. *Evolutionary applications*, 6(4):608–616, 2013.
- 649 P. Samani and G. Bell. Adaptation of experimental yeast populations to stressful conditions in  
650 relation to population size. *Journal of evolutionary biology*, 23(4):791–796, 2010.
- 651 K. Schiffrers, E. C. Bourne, S. Lavergne, W. Thuiller, and J. M. Travis. Limited evolutionary rescue  
652 of locally adapted populations facing climate change. *Philosophical Transactions of the Royal  
653 Society B: Biological Sciences*, 368(1610):20120083, 2013.
- 654 M. Tomasini and S. Peischl. Establishment of locally adapted mutations under divergent selection.  
655 *Genetics*, 209(3):885–895, 2018. doi: 10.1534/genetics.118.301104.



- 656 H. Uecker. Evolutionary rescue in randomly mating, selfing, and clonal populations. *Evolution*, 71  
657 (4):845–858, 2017.
- 658 H. Uecker and J. Hermisson. The role of recombination in evolutionary rescue. *Genetics*, 202(2):  
659 721–732, 2016.
- 660 H. Uecker, S. P. Otto, and J. Hermisson. Evolutionary rescue in structured populations. *The*  
661 *American Naturalist*, 183(1):E17–E35, 2014.
- 662 E. Vander Wal, D. Garant, M. Festa-Bianchet, and F. Pelletier. Evolutionary rescue in vertebrates:  
663 evidence, applications and uncertainty. *Phil. Trans. R. Soc. B*, 368(1610):20120090, 2013.
- 664 B. Waclaw, I. Bozic, M. E. Pittman, R. H. Hruban, B. Vogelstein, and M. A. Nowak. A spatial  
665 model predicts that dispersal and cell turnover limit intratumour heterogeneity. *Nature*, 525  
666 (7568):261, 2015.
